# Supplementary material for: A Nitro Functionalized MOF with Multi-Enzyme Mimetic Activities for the Colorimetric Sensing of Glucose at Neutral pH
Source: MDPI journal article supplement (doi:10.3390/s23146277), 2023-07-10
Supplement: s1 [file s1]

## Supporting Information

### A Nitro Functionalized MOF with Multi-enzyme Mimetic Activities for the Colorimetric Sensing of Glucose at Neutral pH

Ya Wang <sup>1</sup>, Yuanhua Wei <sup>1</sup>, Siqi Li <sup>1,2</sup>, Guang Hu <sup>1,\*</sup>

<sup>1</sup> Chongqing Key Laboratory of Medicinal Chemistry and Molecular Pharmacology, Chongqing University of Technology, Chongqing, China

<sup>2</sup> Chongqing Institute of Innovation and Entrepreneurship for Precision Medicine, Chongqing, China

\* Correspondence: foxhu@cqut.edu.cn

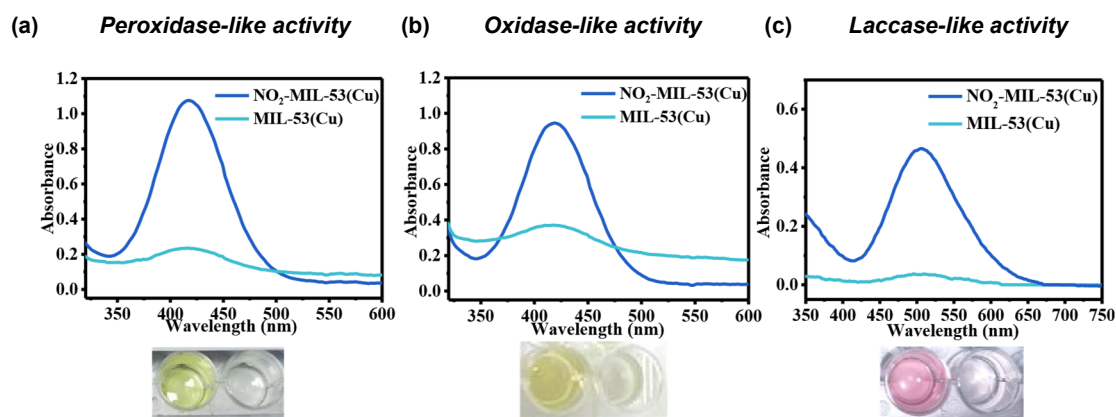

**Figure S1** UV-vis spectra and corresponding images of incubation systems with MIL-53(Cu) and NO<sub>2</sub>-MIL-53(Cu) (the solution in image from left to right is consist to the line from up to down and the images were taken under day light).

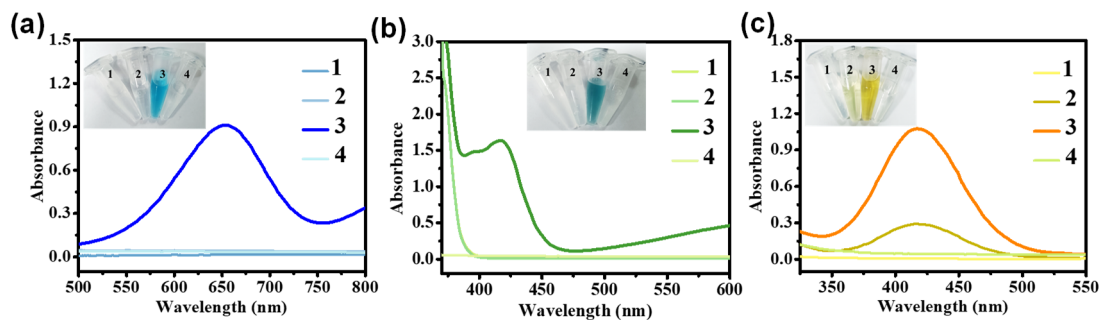

**Figure S2** UV-vis spectra and corresponding images of incubation systems in the presence of H<sub>2</sub>O<sub>2</sub> with different enzyme-linked chromogenic substrates (a) TMB; (b) ABTS; (c) OPD. (1-4 stand for different incubation systems, 1: chromogenic substrate/H<sub>2</sub>O<sub>2</sub>, 2: chromogenic substrate/ NO<sub>2</sub>-MIL-53(Cu), 3: chromogenic substrate/ H<sub>2</sub>O<sub>2</sub>/NO<sub>2</sub>-MIL-53(Cu), 4: H<sub>2</sub>O<sub>2</sub>/ NO<sub>2</sub>-MIL-53(Cu), and the inset images were taken under day light).

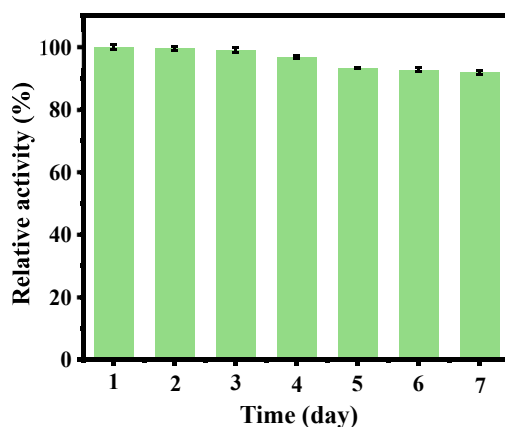

**Figure S3** Peroxidase-like activity of NO<sub>2</sub>-MIL-53(Cu) during seven-day storing.

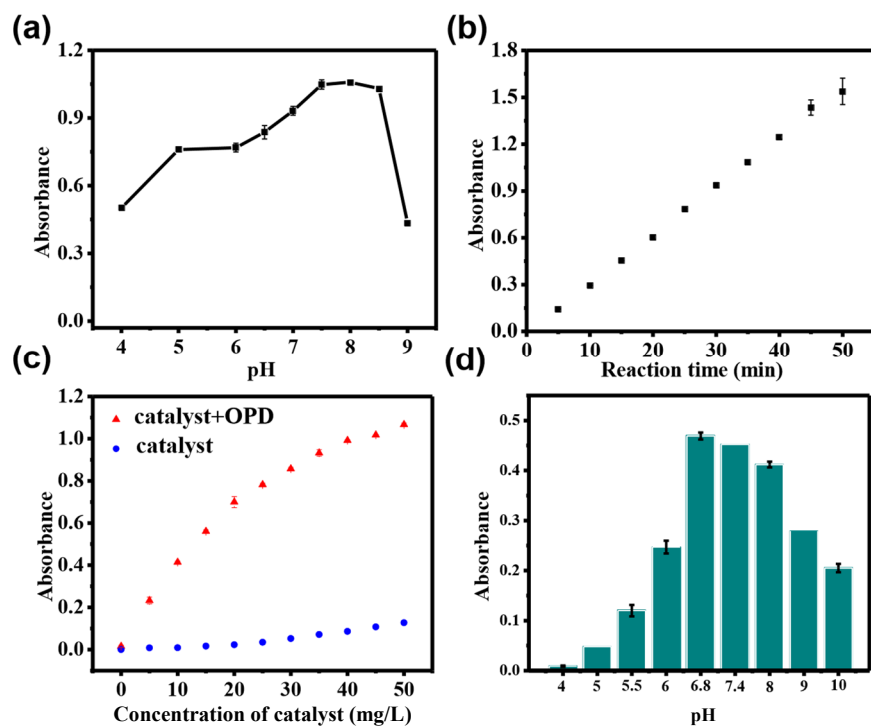

**Figure S4** Effects of (a) pH, (b) reaction time, (c) catalyst concentration on the oxidase-like activity of NO<sub>2</sub>-MIL-53(Cu). And (d) Effects of pH to the laccase-like activity of NO<sub>2</sub>-MIL-53(Cu).

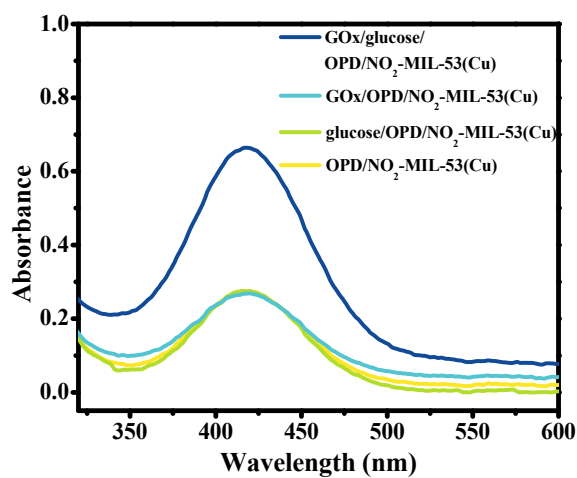

**Figure S5** UV-vis spectra of different incubation systems in glucose detection (reaction concentrations: OPD 0.3 mM, GOx  $5 \times 10^{-3}$  mg/mL, glucose 2 mM, and catalyst 20 mg/L).

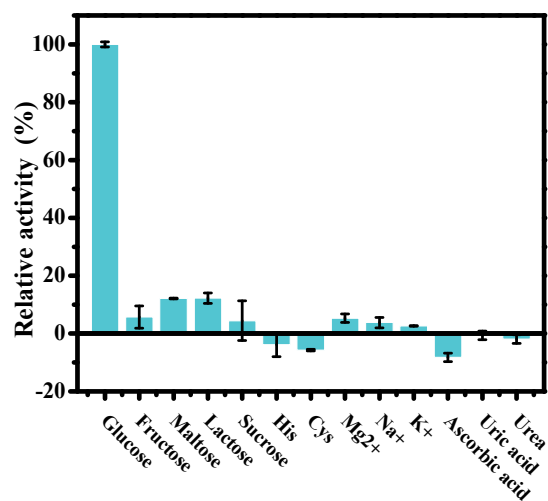

**Figure S6** Effects of various common species towards glucose detection: (0.01 mM His and Cys; 0.02mM ascorbic acid and Uric acid; and the others 0.2 mM).

**Table S1.** Comparison of various MOFs-based colorimetric detection platform for glucose detection.

| MOFs-based nanozymes        | Peroxidase incubation<br>pH | Linear range<br>( $\mu\text{M}$ ) | LOD ( $\mu\text{M}$ ) | Ref       |
|-----------------------------|-----------------------------|-----------------------------------|-----------------------|-----------|
| Fe-BTC                      | 4                           | 5.0–100                           | 2.4                   | [39]      |
| Cu–hemin MOFs               | 6                           | 10–3000                           | 6.9                   | [40]      |
| Magnetic ZIF-8              | 4                           | 5–150                             | 1.9                   | [41]      |
| PCN-222(Fe)                 | 4                           | 12–75                             | 2.2                   | [42]      |
| CuBDC                       | 5.2                         | 10–500                            | 4.1                   | [43]      |
| Pt/Fe-MOF                   | 4                           | 2–400                             | 2.3                   | [44]      |
| Fe-MIL-101                  | 7.4                         | up to 150                         | 2.5                   | [45]      |
| NO <sub>2</sub> -MIL-53(Cu) | 7.4                         | 0.5–300                           | 2.6                   | This work |

**References:**

39. Zhao, Z.; Pang, J.; Liu, W.; Lin, T.; Ye, F.; Zhao, S., A bifunctional metal organic framework of type Fe(III)-BTC for cascade (enzymatic and enzyme-mimicking) colorimetric determination of glucose. *Microchim. Acta* **2019**, 186, (5).
40. Liu, F.; He, J.; Zeng, M.; Hao, J.; Guo, Q.; Song, Y.; Wang, L., Cu–hemin metal-organic frameworks with peroxidase-like activity as peroxidase mimics for colorimetric sensing of glucose. *J Nanopart Res* **2016**, 18, (5).
41. Hou, C.; Wang, Y.; Ding, Q.; Jiang, L.; Li, M.; Zhu, W.; Pan, D.; Zhu, H.; Liu, M., Facile synthesis of enzyme-embedded magnetic metal–organic frameworks as a reusable mimic multi-enzyme system: mimetic peroxidase properties and colorimetric sensor. *Nanoscale* **2015**, 7, (44), 18770–18779.
42. Aghayan, M.; Mahmoudi, A.; Nazari, K.; Dehghanpour, S.; Sohrabi, S.; Sazegar, M. R.; Mohammadian-Tabrizi, N., Fe(III) porphyrin metal–organic framework as an artificial enzyme mimics and its application in biosensing of glucose and H<sub>2</sub>O<sub>2</sub>. *J. Porous Mater.* **2019**, 26, (5), 1507–1521.
43. Cheng, X.; Zheng, Z.; Zhou, X.; Kuang, Q., Metal–organic framework as a compartmentalized integrated nanozyme reactor to enable high-performance cascade reactions for glucose detection. *ACS Sustain. Chem.Eng.* **2020**, 8, (48), 17783–17790.
44. Li, J.; Zhao, J.; Li, S.; Chen, Y.; Lv, W.; Zhang, J.; Zhang, L.; Zhang, Z.; Lu, X., Synergistic effect enhances the peroxidase-like activity in platinum nanoparticle-supported metal–organic framework hybrid nanozymes for ultrasensitive detection of glucose. *Nano Res.* **2021**, 14, (12), 4689–4695.
45. Ortiz-Gómez, I.; Salinas-Castillo, A.; García, A. G.; Álvarez-Bermejo, J. A.; de Orbe-Payá, I.; Rodríguez-Diéguez, A.; Capitán-Vallvey, L. F., Microfluidic paper-based device for colorimetric determination of glucose based on a metal-organic framework acting as peroxidase mimetic. *Microchim. Acta* **2017**, 185, (1).
